# Supplementary material for: Tumor extracellular pH-sensitive polymeric nanocarrier-grafted platinum(iv) prodrugs for improved intracellular delivery and cytosolic reductive-triggered release
Source: Royal Society of Chemistry journal article supplement (doi:10.1039/c9py01838g), 2020-01-01
Supplement: c9py01838g1.pdf [file c9py01838g1.pdf]

## Tumor Extracellular pH-Sensitive Polymeric Nanocarriers Grafted Platinum(IV) Prodrugs for Improved Intracellular Delivery and Cytosolic Reductive-triggered Release

Sheng-Qi Chen <sup>\*a</sup>, Gang Song <sup>a</sup>, Chen He <sup>b</sup>, Mei Hou <sup>a</sup>, Wei-Dong He <sup>c</sup>, Hui-Juan Li <sup>c</sup>, Abdul Haleem <sup>c</sup>, Qing-lin Li <sup>\*a</sup>, Rong-Feng Hu <sup>\*a</sup>

### Supplementary Material

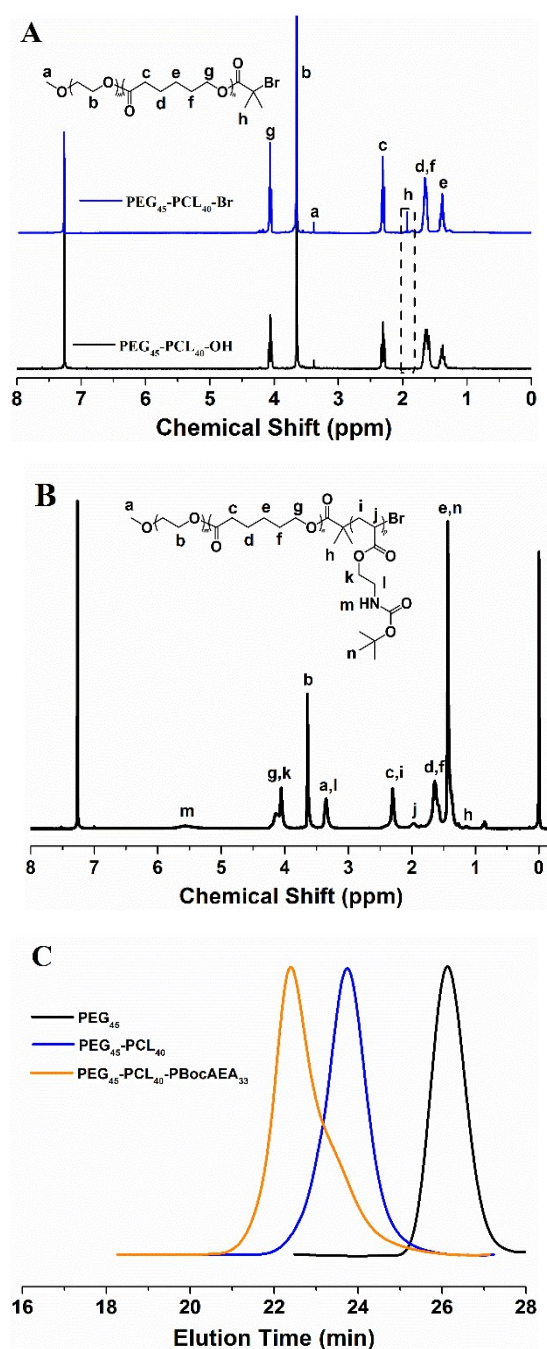

**Figure S1.** <sup>1</sup>H-NMR spectra of PEG<sub>45</sub>-PCL<sub>40</sub>-OH (A, black), PEG<sub>45</sub>-PCL<sub>40</sub>-Br (A, blue) and PEG<sub>45</sub>-PCL<sub>40</sub>-PBocAEA<sub>33</sub> (B) in CDCl<sub>3</sub>; GPC curves of PEG<sub>45</sub>, PEG<sub>45</sub>-PCL<sub>40</sub> and PEG<sub>45</sub>-PCL<sub>40</sub>-PBocAEA<sub>33</sub> (C).

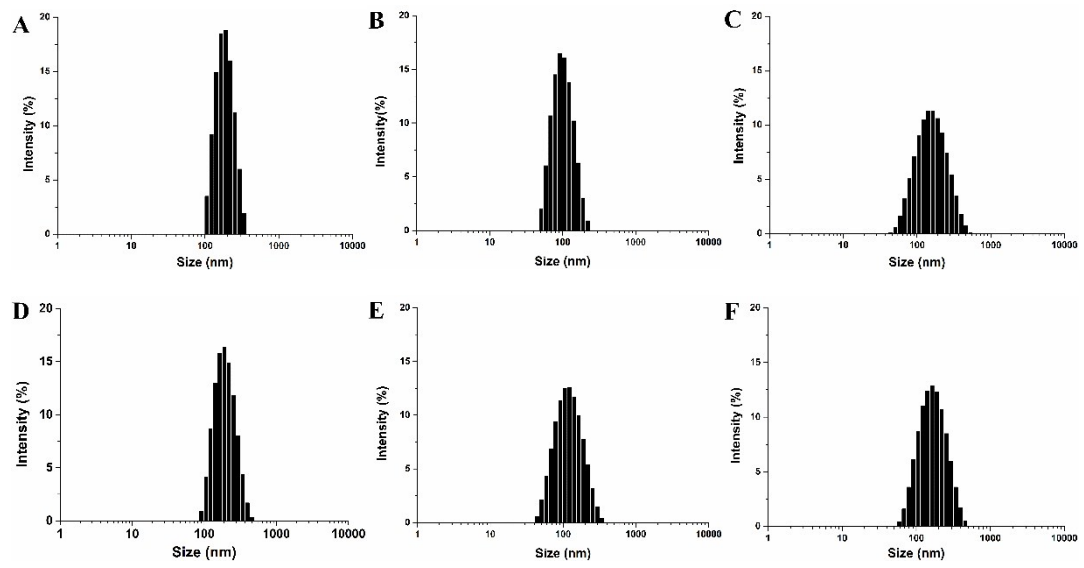

**Figure S2.** Size distributions of esNP (A), esNP-Flu (B), esNP-Pt (C), isNP (D), isNP-Flu (E) and isNP-Pt (F) determined by dynamic light scattering.

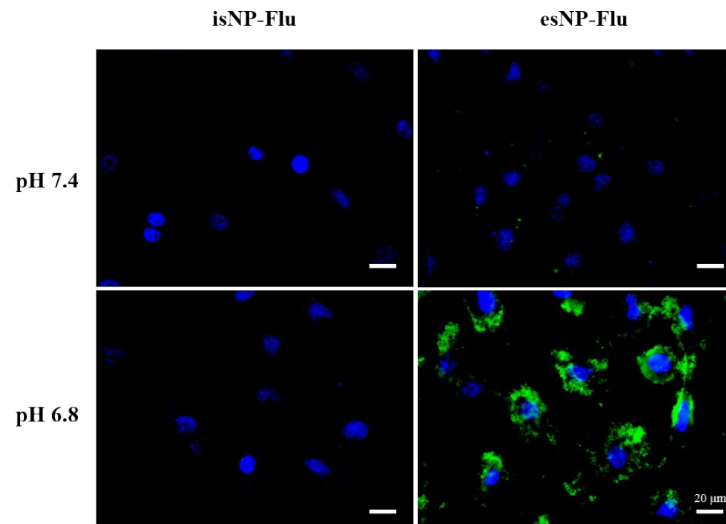

**Figure S3.** CLSM images (B) of A549 cells incubated with isNP-Flu and esNP-Flu at pH 7.4 and 6.8.
